# Supplementary material for: Cationic-motif-modified exosomes for mRNA delivery to retinal photoreceptors
Source: Royal Society of Chemistry journal article supplement (doi:10.1039/d4tb00849a), 2024-01-01
Supplement: d4tb00849a1.pdf [file d4tb00849a1.pdf]

## 1 Supplemental Figures

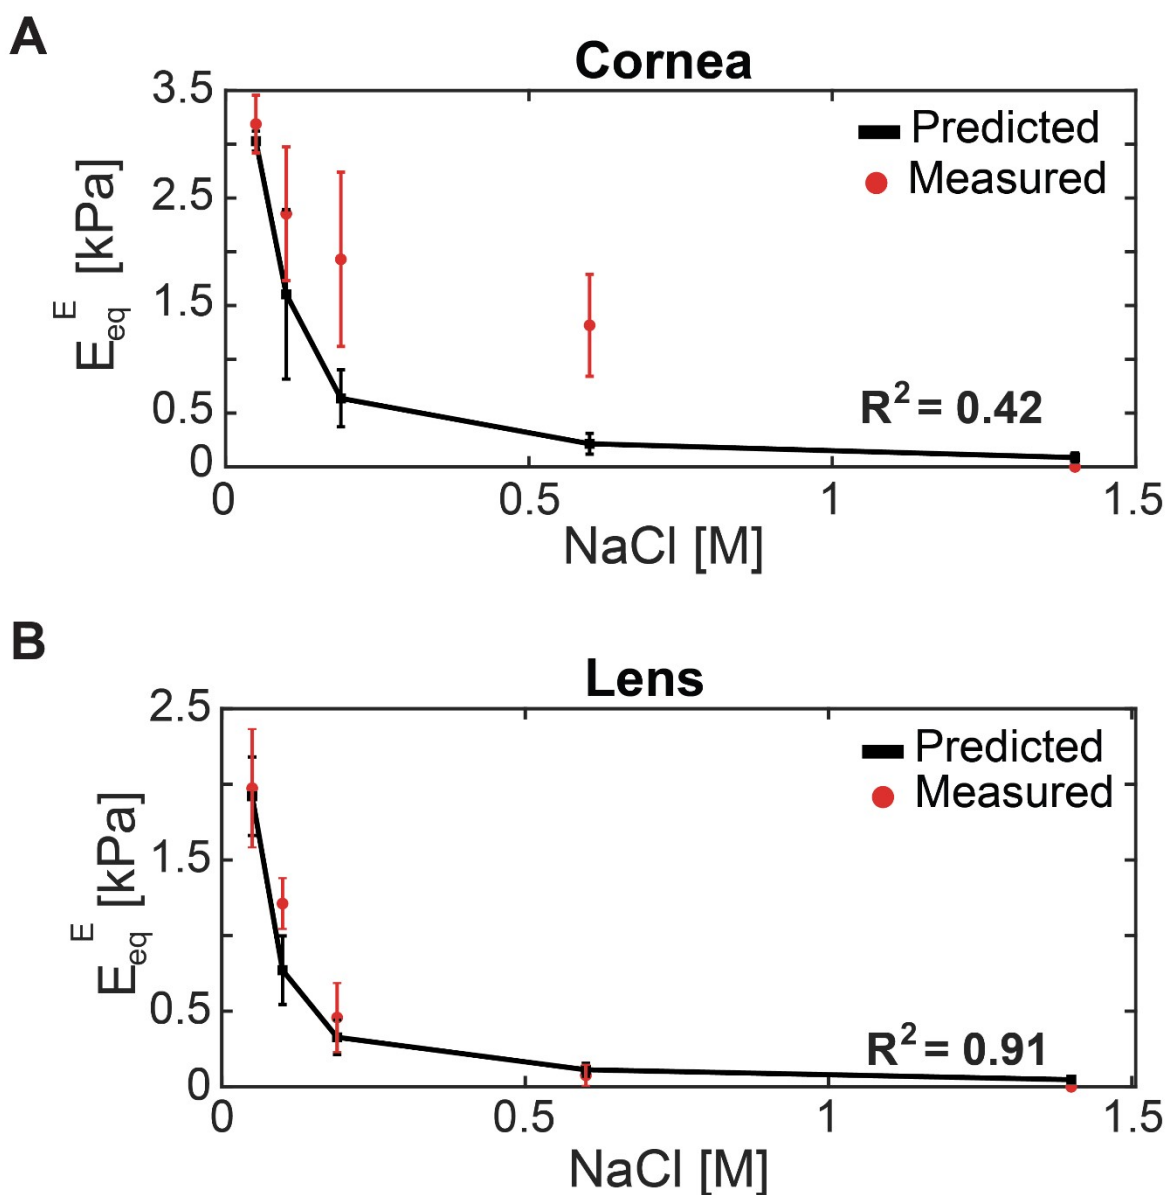

**Figure S 1** Measured (red) and predicted (black) electrostatic component ( $E_{Eq}^E$ ) of the bulk modulus ( $E_{Eq}$ ) vs bath salinity. **(A)**  $E_{Eq}^E$  of 8 mm corneal explants had a poor fit to the Ideal Donnan model prediction curve. **(B)**  $E_{Eq}^E$  of lenses closely followed the Ideal Donnan model.

2

3

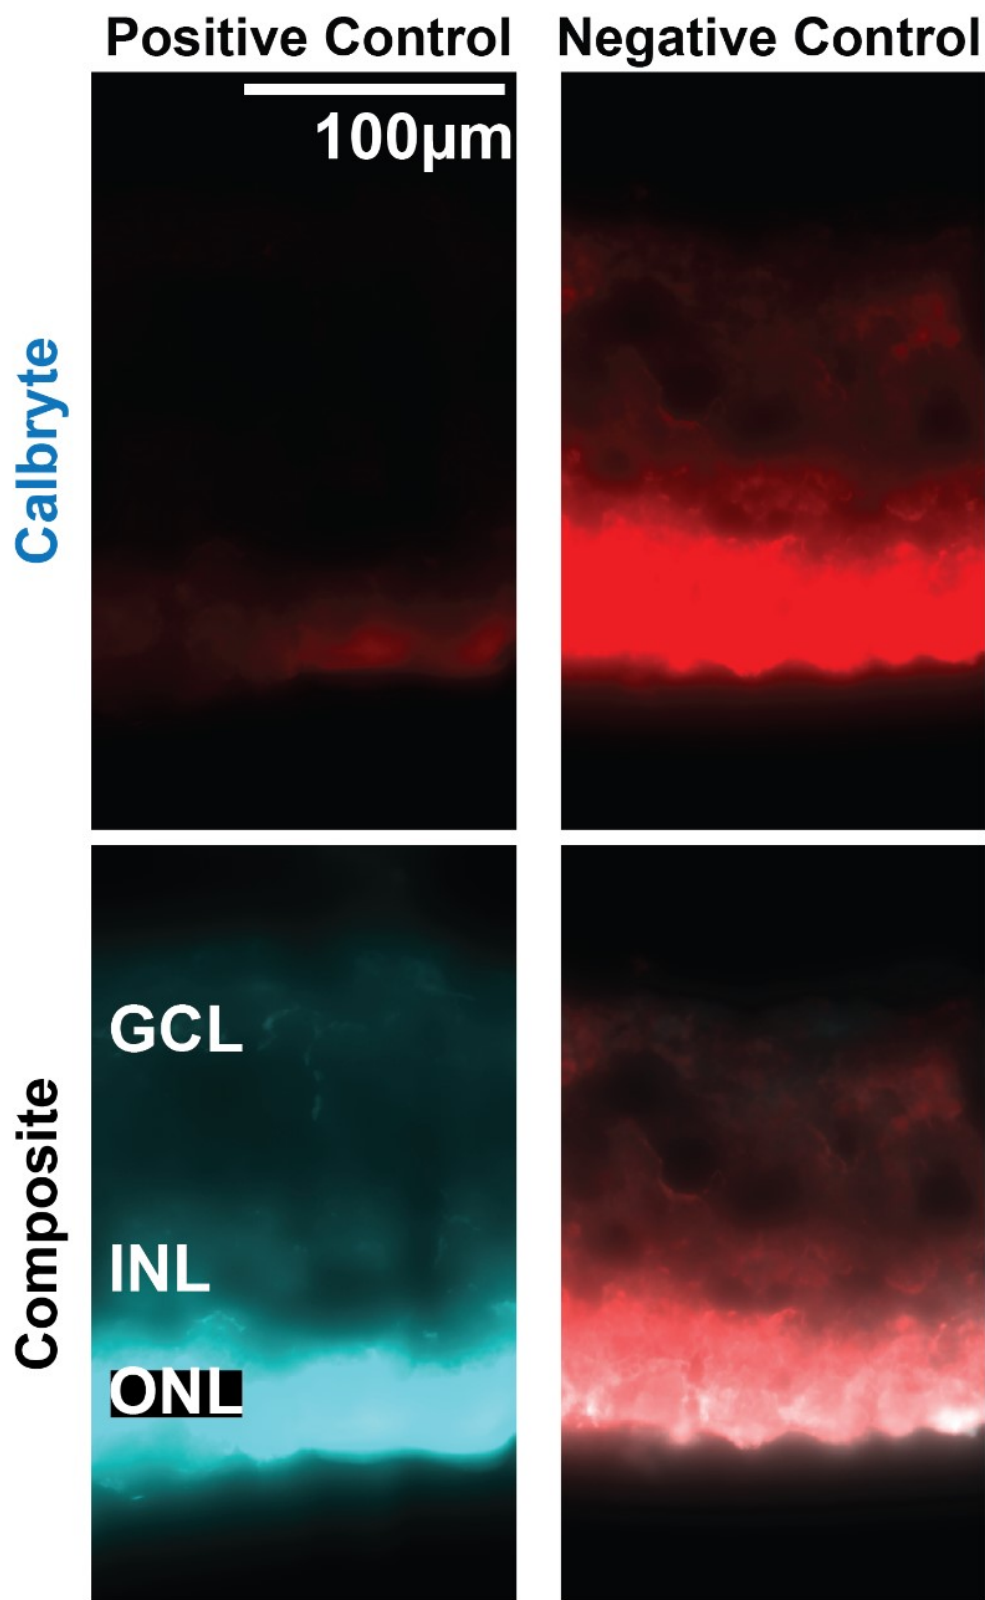

**Figure S 2** Representative images of positive and negative control tissues from live/dead assay. Calbryte AM (cyan) and Zombie Red (red) channels shown.
